# Supplementary material for: Stable Isotope Dynamic Labeling of Secretomes (SIDLS) Identifies Authentic Secretory Proteins Released by Cancer and Stromal Cells
Source: PubMed Central journal article supplement (PMC6126392; doi:10.1074/mcp.tir117.000516), 2018-06-18

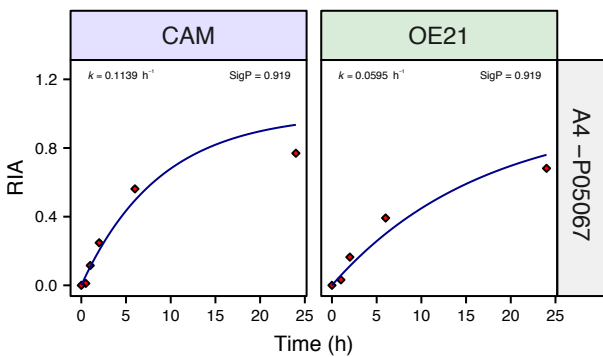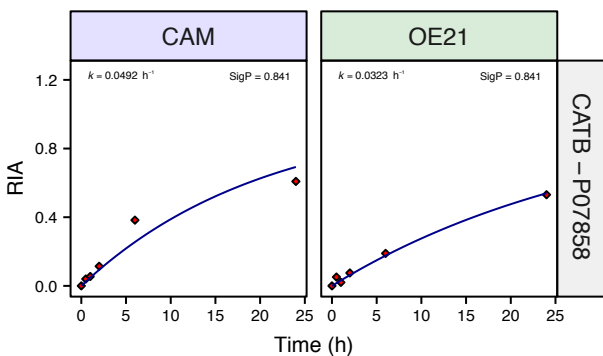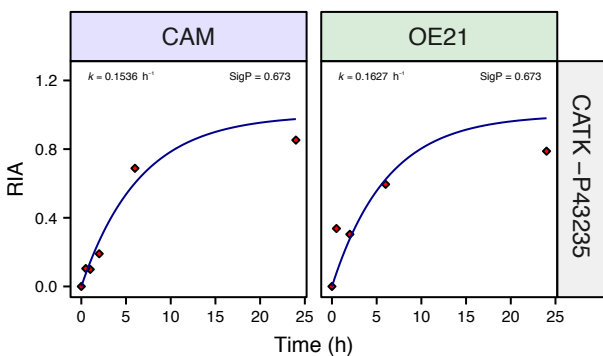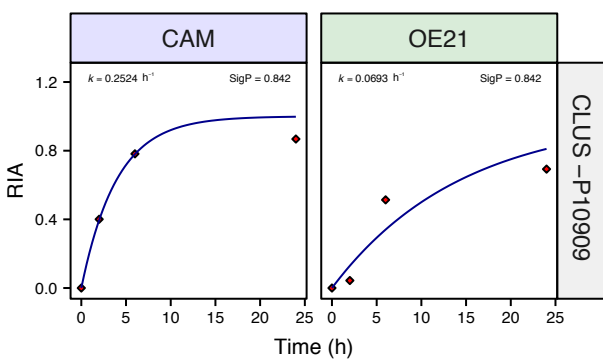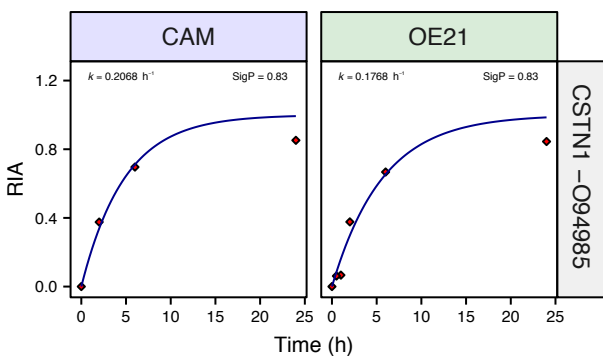

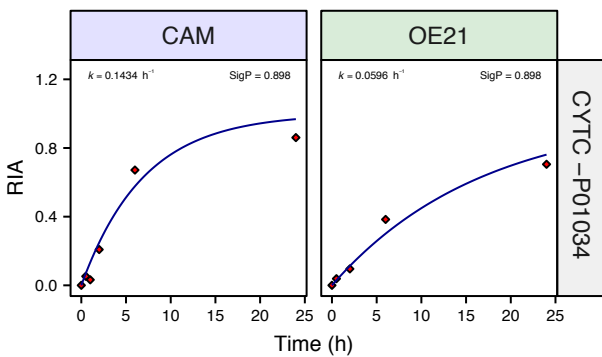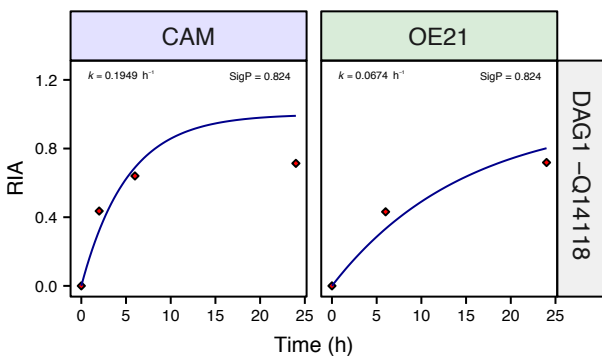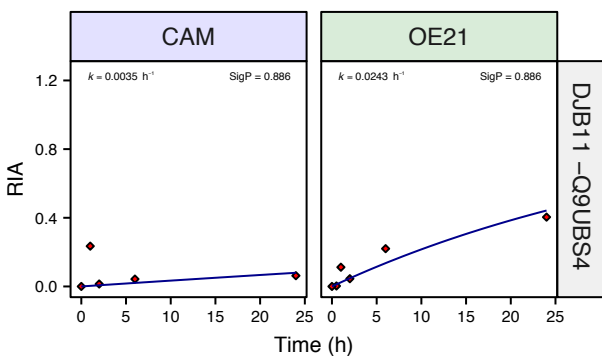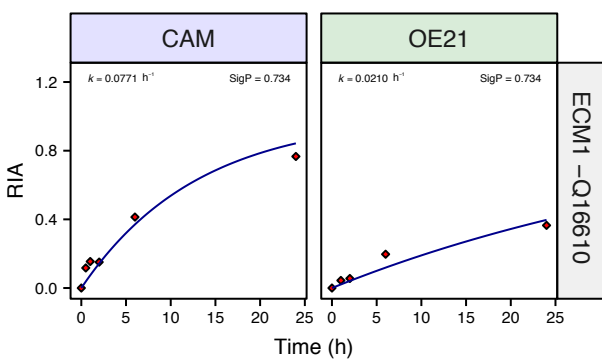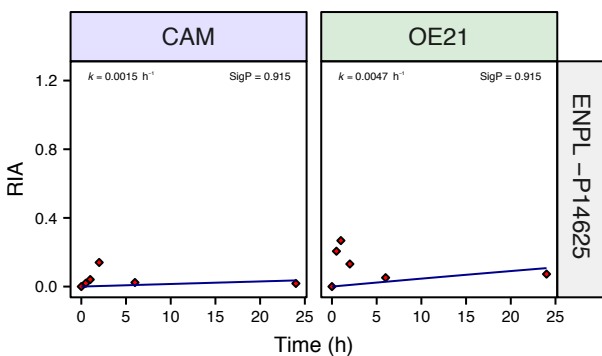

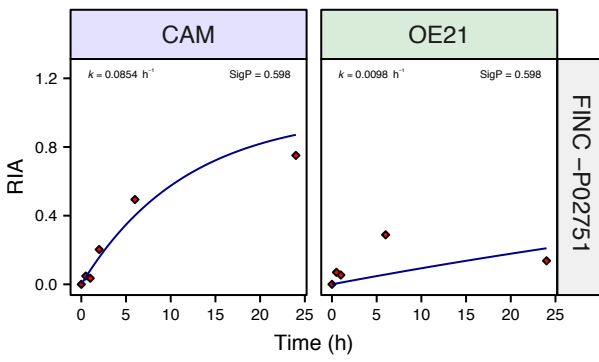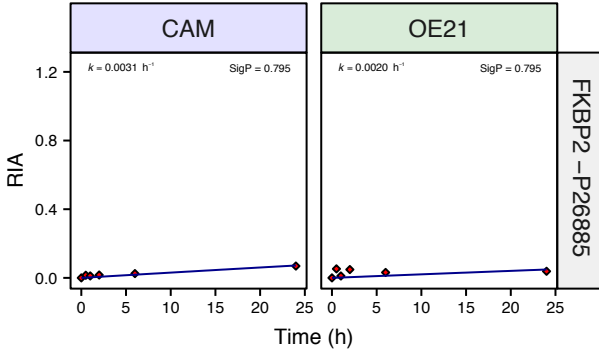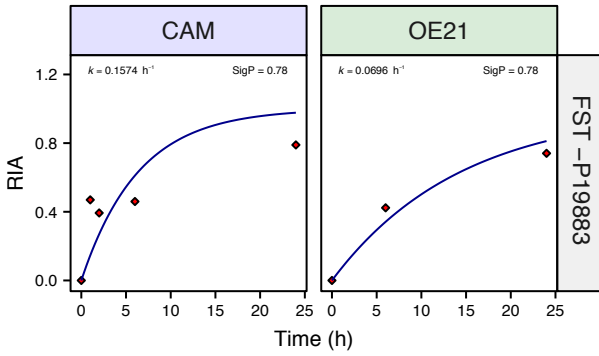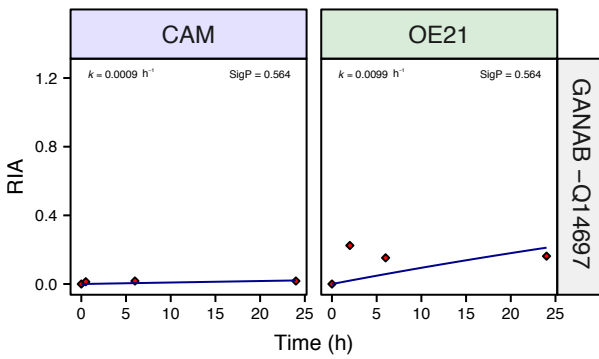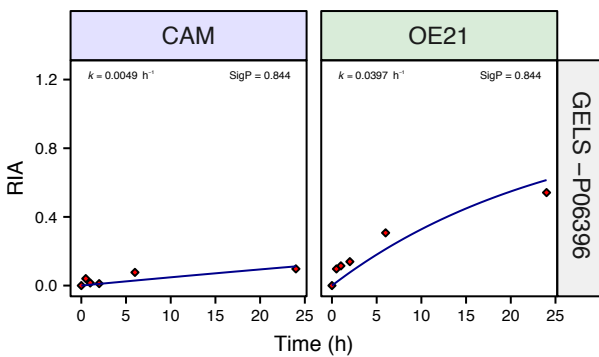

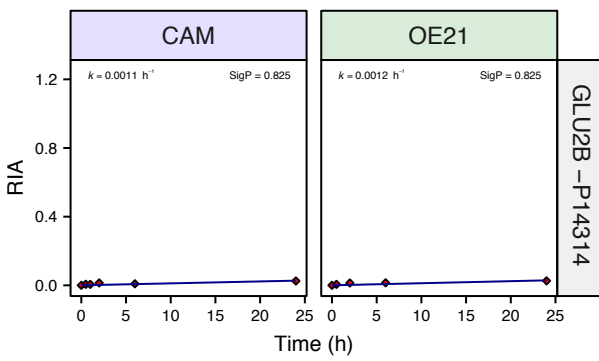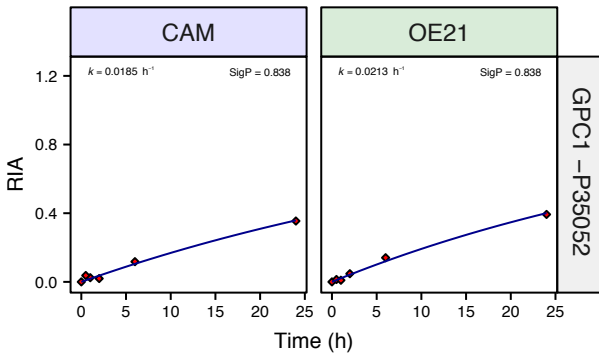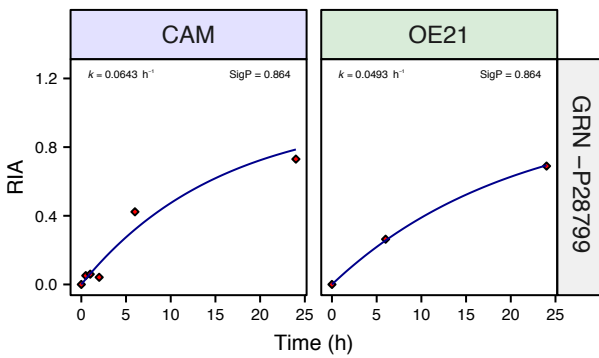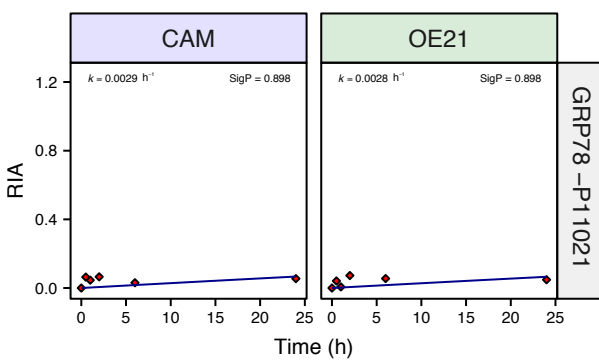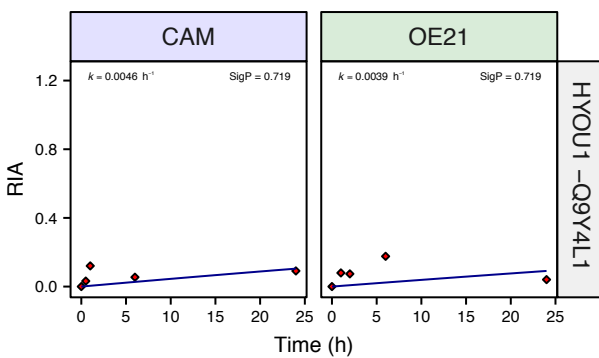

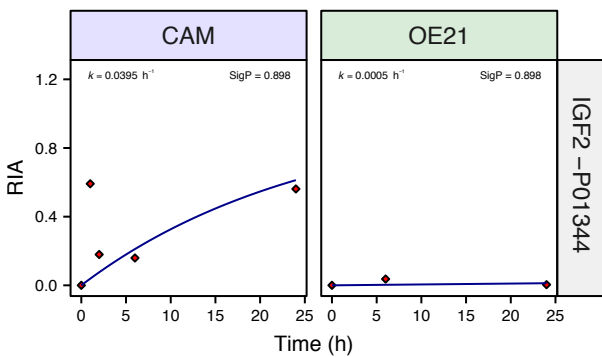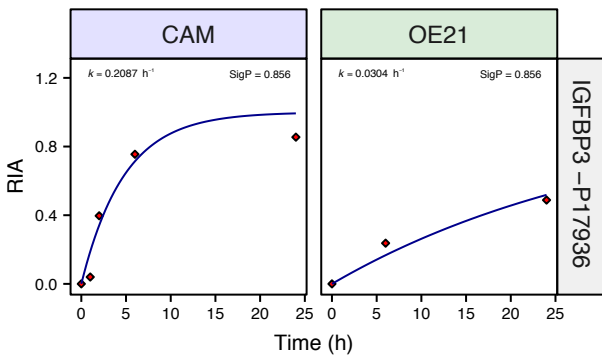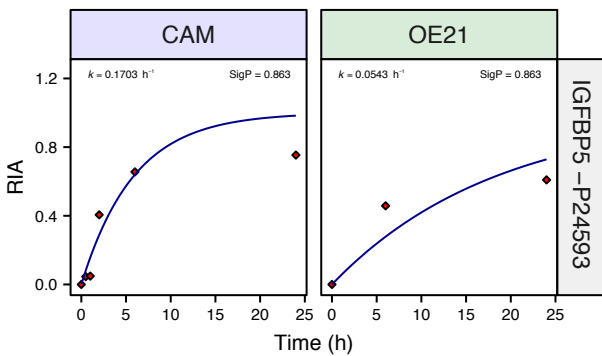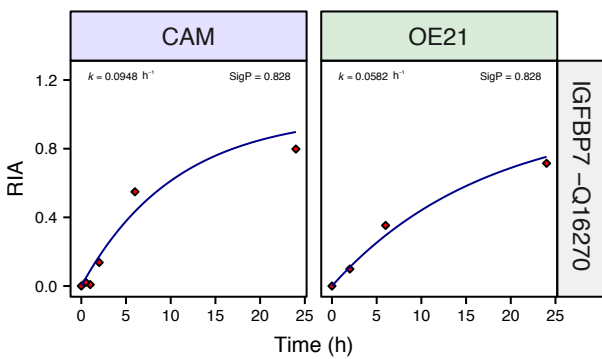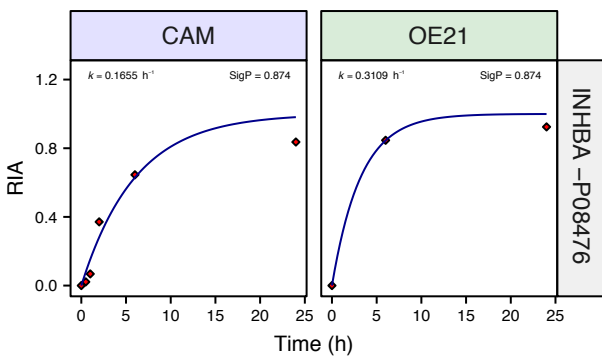

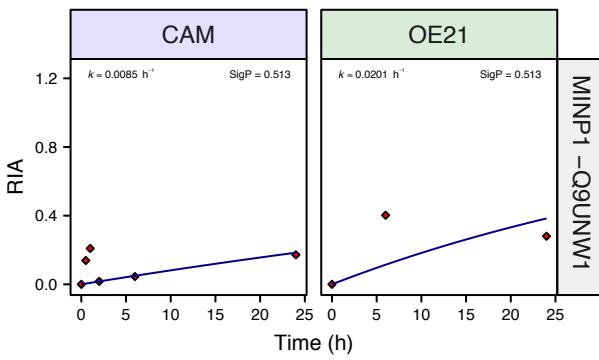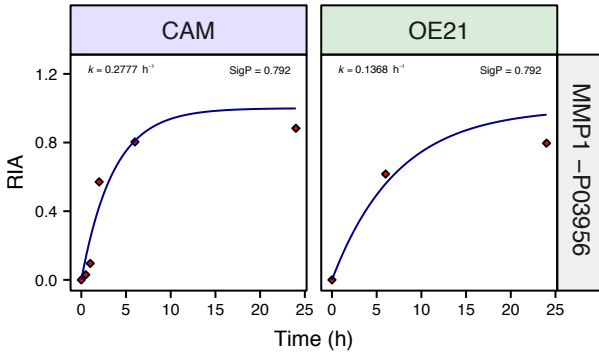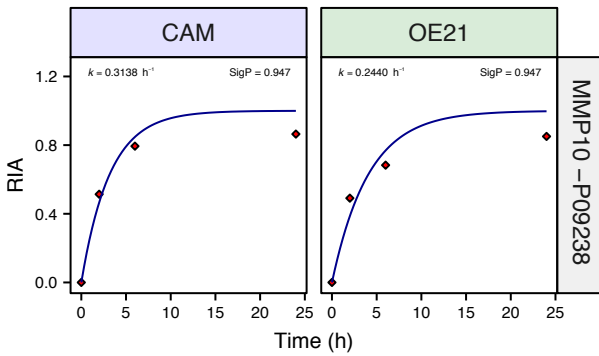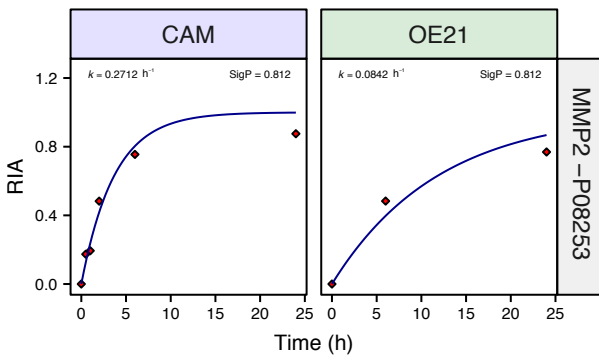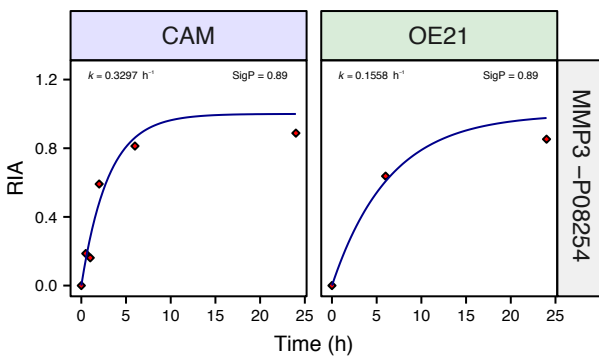

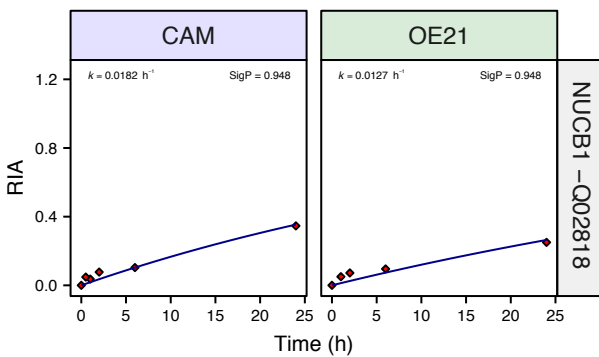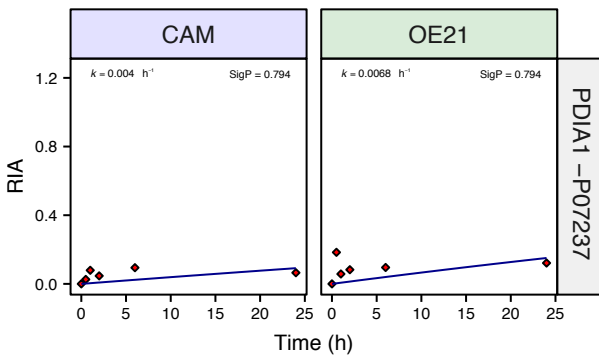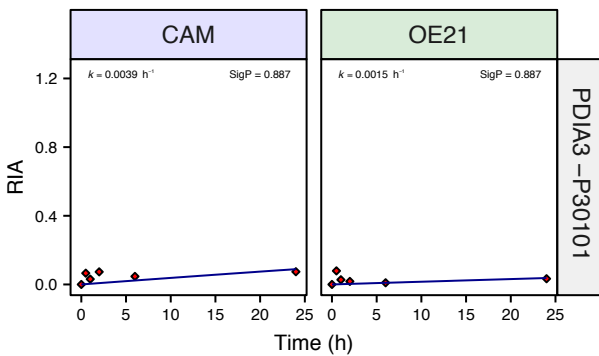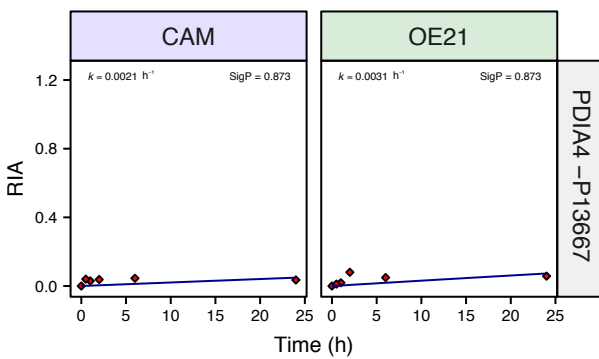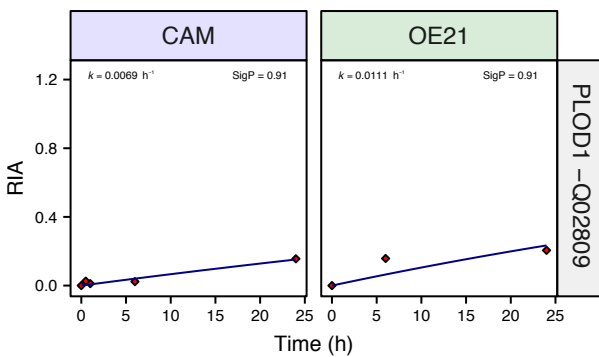

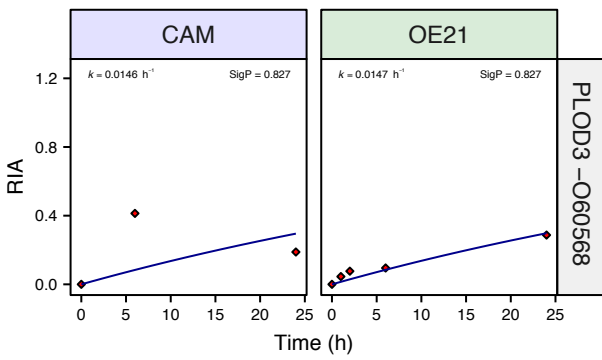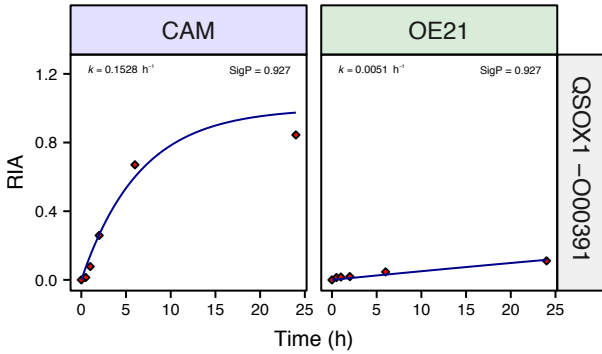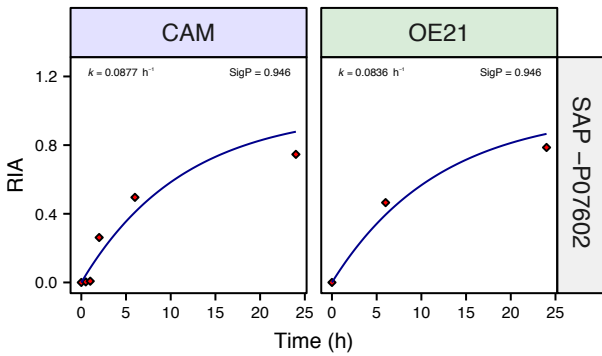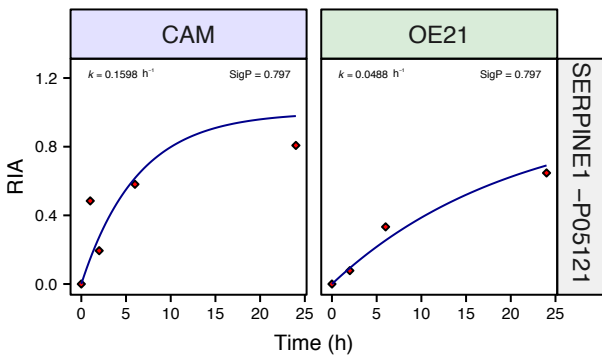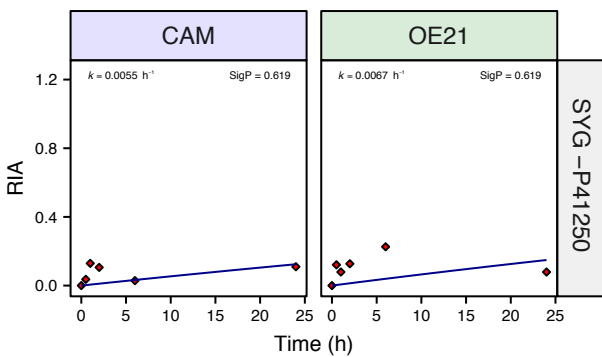



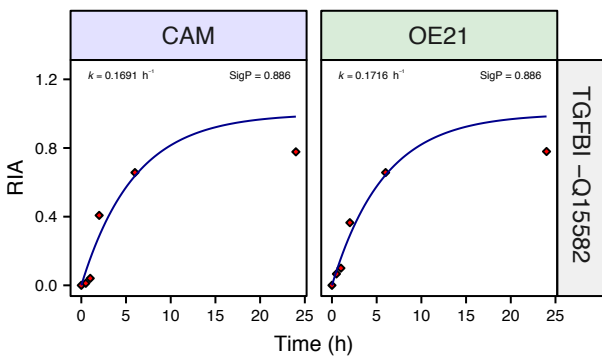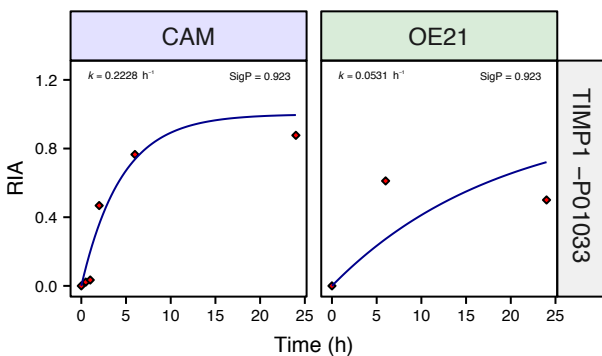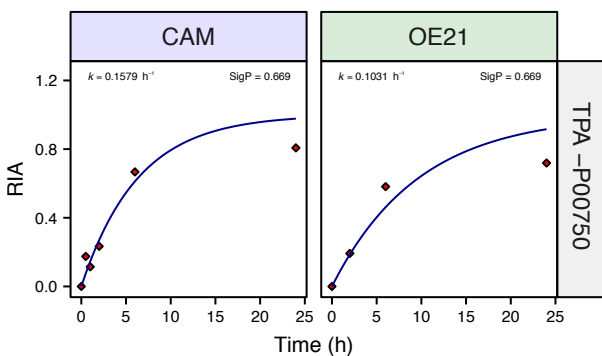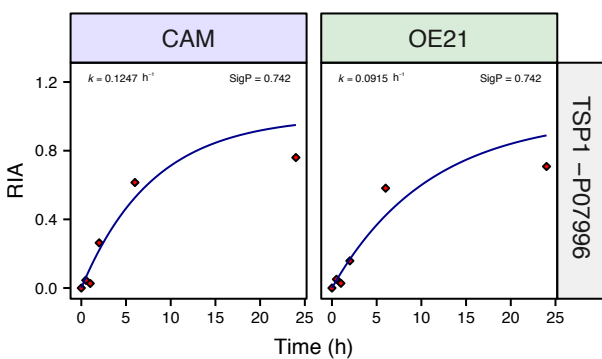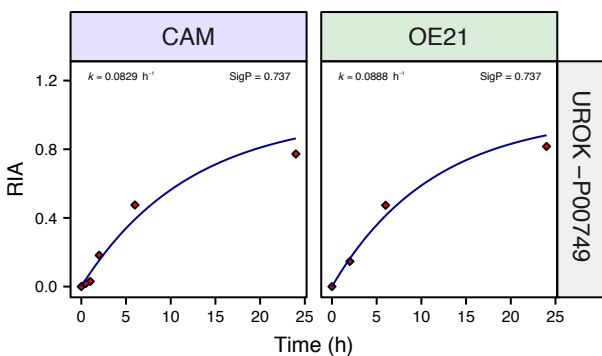

Supplement: 134290_3_supp_155576_pqqqgs.pdf [file 134290_3_supp_155576_pqqqgs.pdf]
